# Supplementary material for: Electrical field and biaxial strain tunable electronic properties of the PtSe2/Hf2CO2 heterostructure
Source: Royal Society of Chemistry journal article supplement (doi:10.1039/d3ra04363k), 2023-01-01
Supplement: d3ra04363k1.pdf [file d3ra04363k1.pdf]

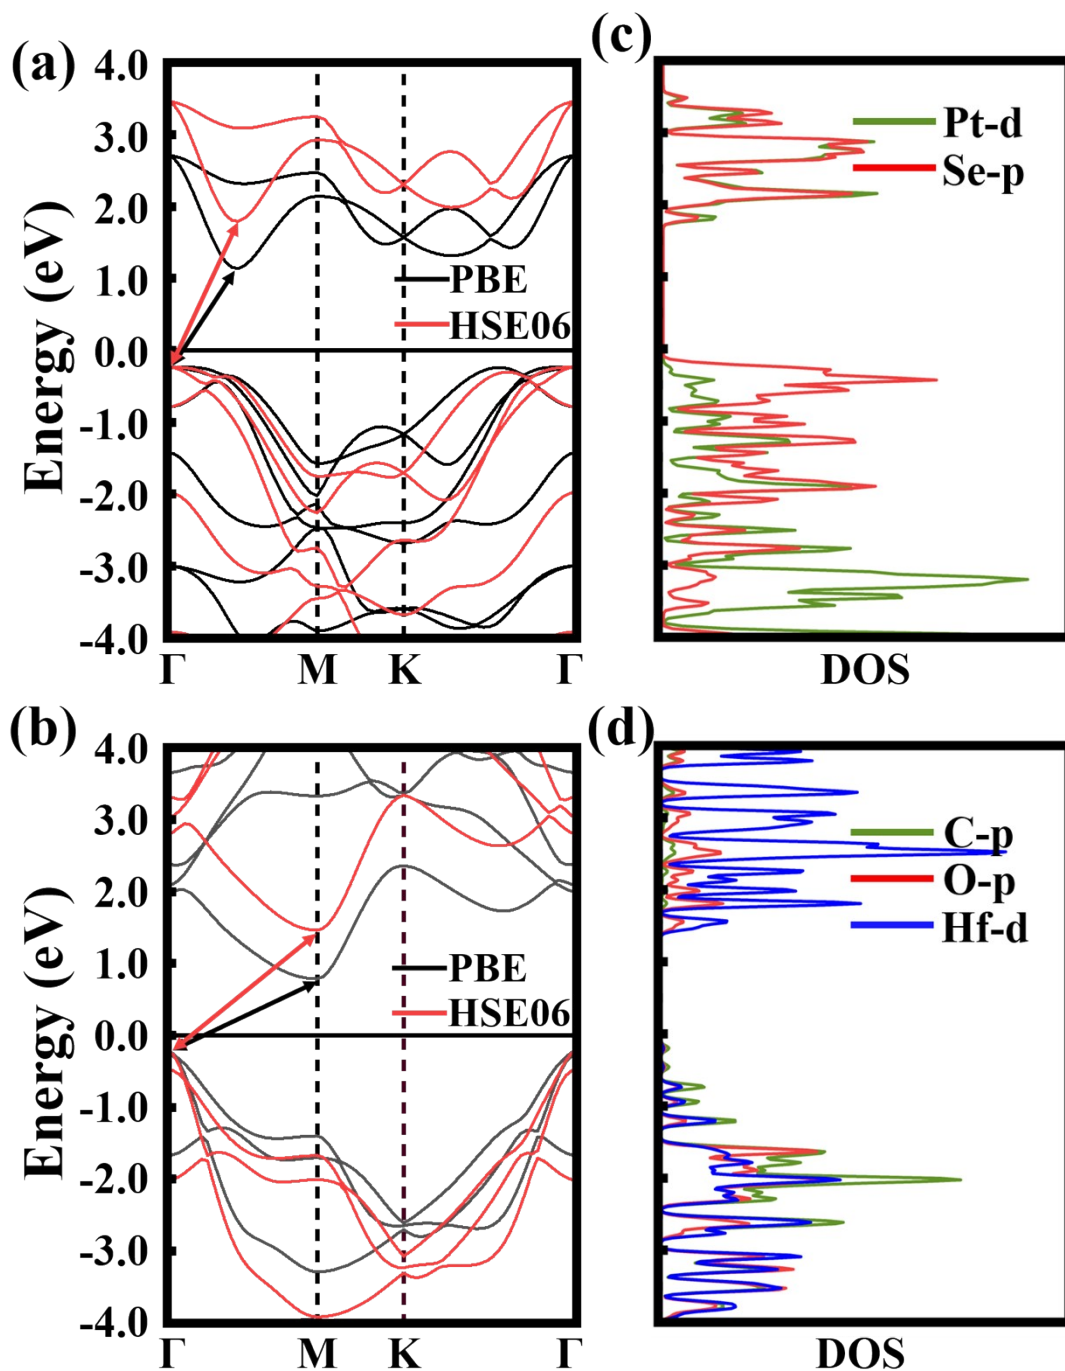

Fig.S1 (a,b) The band structures and (c,d) corresponding partial densities of states (PDOS) of the primitive cells of PtSe<sub>2</sub> and Hf<sub>2</sub>CO<sub>2</sub> monolayers. The band structures are calculated by PBE & HSE06 methods, while the partial densities of states are calculated by HSE06 method with Fermi level is set to be zero, which are presented by black & red line, respectively.

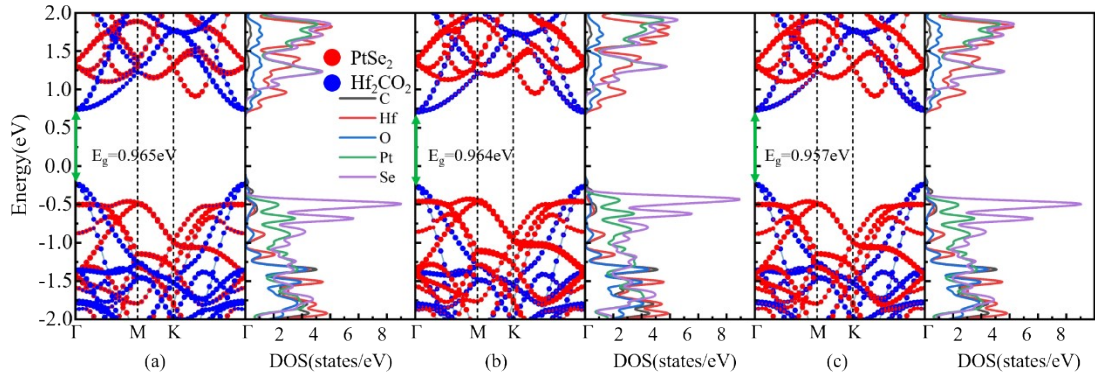

Fig.S2 The projected band structure and PDOS calculated by PBE functional of PtSe<sub>2</sub>/Hf<sub>2</sub>CO<sub>2</sub> vdW heterostructure with different stacks of (a) Stacking-I, (b) Stacking-II and (c) Stacking-III, respectively. The red and blue lines and dots represent are for PtSe<sub>2</sub> and Hf<sub>2</sub>CO<sub>2</sub>, respectively. The Fermi level is set at zero.

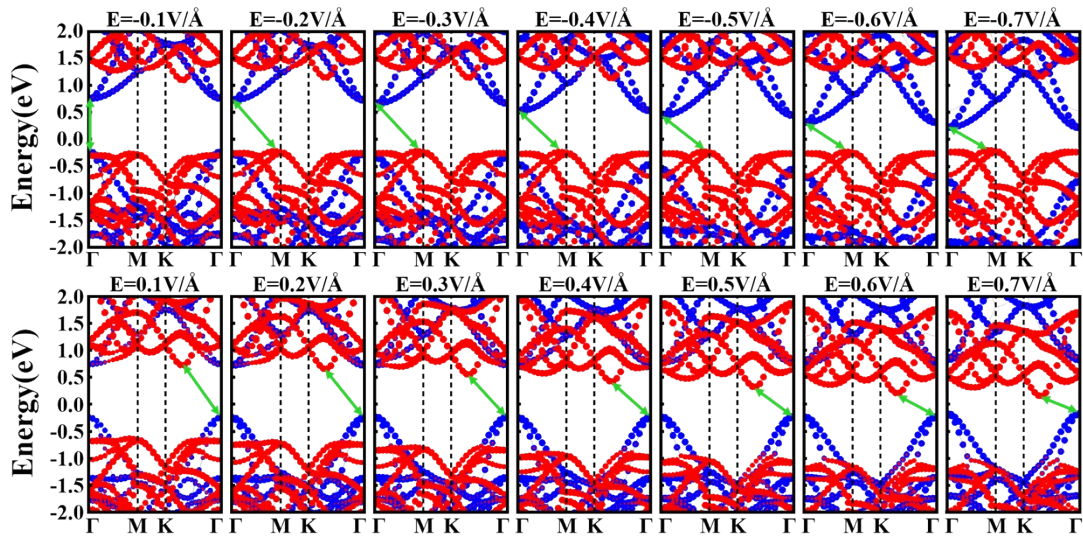

Fig.S3 The band structures of PtSe<sub>2</sub>/Hf<sub>2</sub>CO<sub>2</sub> heterostructure under the negative electric field varying from -0.1 to -0.7 V/Å, and positive electric fields varying from 0.1 to 0.7 V/Å, where the red and blue dots represent PtSe<sub>2</sub> and Hf<sub>2</sub>CO<sub>2</sub>, respectively. The green arrow lines represent the CBM and VBM.
